# Supplementary material for: Selective interleukin-1 receptor–associated kinase 4 inhibitors for the treatment of autoimmune disorders and lymphoid malignancy
Source: PubMed Central journal article supplement — J Exp Med. 2015 Dec 14;212(13):2189–201. doi: 10.1084/jem.20151074 (PMC4689168; doi:10.1084/jem.20151074), 2015-12-14
Supplement: supp_jem.20151074_JEM_20151074_sm.pdf [file supp_jem.20151074_JEM_20151074_sm.pdf]

SUPPLEMENTAL MATERIAL

Kelly et al., <http://www.jem.org/cgi/content/full/jem.20151074/DC1>

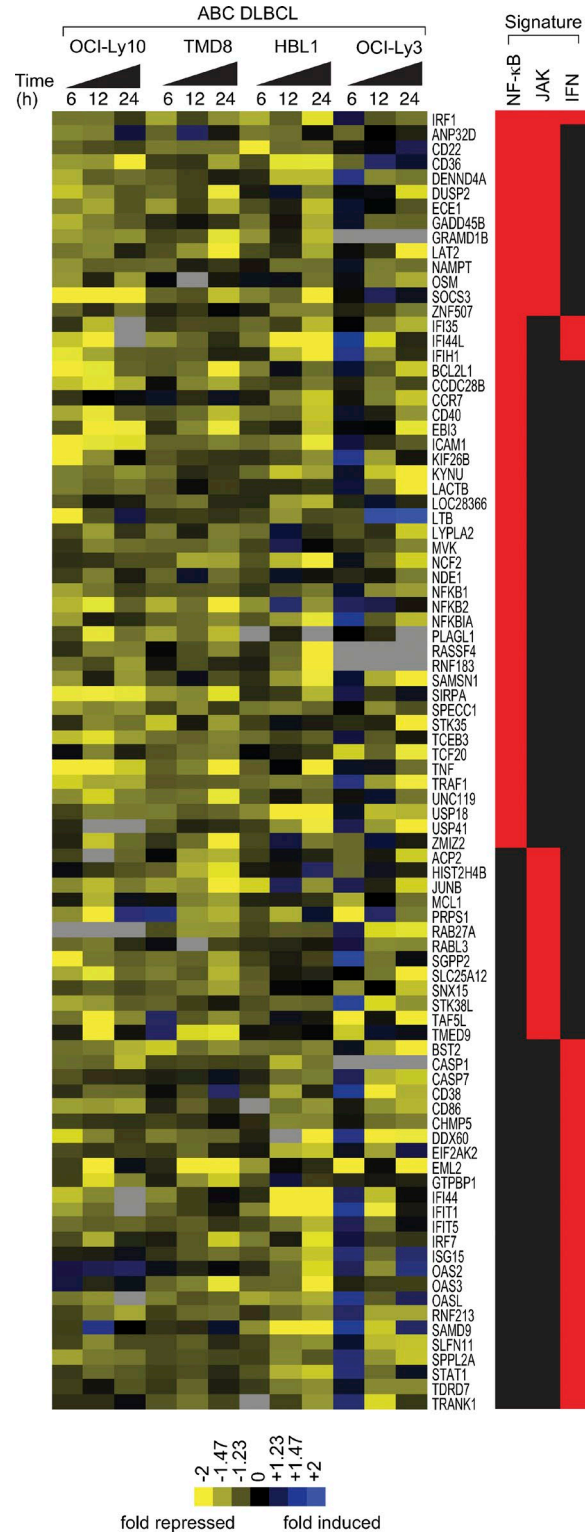

Figure S1. Gene expression changes in ABC DLBCL after treatment with the small molecule IRAK4 inhibitor ND-2158. Gene expression changes induced by 10 μM ND-2158 after a time course of treatment (0, 6, 12, and 24 h) in four ABC DLBCL lines. Relative gene expression of ND-2158 versus ND-1659 (negative control compound) is displayed according to the blue/yellow color scale shown. Red bars indicate genes that belong to the specific enrichment signature shown (i.e., NF-κB, JAK, or IFN signatures). Gene expression data has been deposited under GEO accession no. GSE63029.

Table S1, included as a separate Excel file, shows the percent inhibition assessed for 334 kinases in the presence of 10  $\mu$ M ND-2158 or ND-2110.

Table S2, included as a separate Excel file, shows gene expression signature enrichment for genes down-modulated by ND-2158 treatment in ABC DLBCL.
